# Supplementary material
Source: publisher figshare collection journal article supplement (https://frontiersin.figshare.com/ndownloader/files/23740256)
Supplement: Supplementary file 1 [file 23740256]

## Sheet: IKMWT datasheet
Taxon	Species	NAAMES2								NAAMES3							NAAMES 4
		Stn1-Tow1	Stn2-Tow2	Stn3-Tow3	Stn4-Tow4	Stn4-Tow5	Stn4-Tow6	Stn4-Tow7	Stn5-Tow8	Stn1-Tow1	Stn2-Tow2	Stn3-Tow3	Stn4-Tow4	Stn5-Tow5	Stn6-Tow6	Stn6-Tow7	Stn2-Tow2	StnE4-Tow1	Stn2RD-Tow1	Stn2RF-Tow1
		cyclone	anticyclone	anticyclone	anticyclone	anticyclone	anticyclone	anticyclone	cyclone	anticyclone	cyclone	mode-water	cyclone	out-of-eddy	out-of-eddy	out-of-eddy	out-of-eddy	cyclone	out-of-eddy	out-of-eddy
Hatchetfish	Argyropelecus cf. hemigymnus, "half-naked hatchetfish"				3	3	3	4		14							4	1	2	1
	Sternoptyx pseudobscura, "highlight hatchetfish"							1								1				1
Myctophids	Diaphus brachycephals, "short-headed lanternfish"							3		2							3		2
	Diogenichthys atlanticus		7		1	4	1			3	62		92	9	6		6
	Mictophum nitidulum								7
	Mictophum punctatum					7					8
	Benthosema glaciale		18	4	3	2	3		3		16		3	14	2	15		2		2
	Lampanyctus sp.				6	3	3												2
	Loweina interrrupta			1
	Unidentified myctophids	many						3
	Juvenile myctophids					3			1	5		31
	Lobianchia dofleini									2							8
	Nannobrachium sp.											1				1
	Protomyctophum arcticum															6
Viperfish	Chauliodus danae, "Dana viperfish"			1				1								1				1
	Photostomias sp. "loosejaw viperfish"
	juvenile Chauliodus viperfish																6			1
Dragonfish	Bathophilus proximus							1
	Leptostomias sp.			1
	Eustomias sp. "barbeled dragonfish"		1											1
	Photostomias guernei, "loosejaw dragonfish"															1
	Stomias affinis, "Gunther's boafish"												1
	juvenile Stomias affinis												4
	Astronesthes sp., "snaggletooth"															1
	unidentified melanostomiid																		1
Lightfish	Vinceguerria sp lightfish																		1
Bristlemouths	Cyclothone pseudopallida, "slender bristlemouth"	18	9	4				16	35								2	3		2
	Juvenile Cyclothone sp.		30	60	40	35													7
	Gonostoma atlanticum "Atlantic fangjaw"									1
	Gonostoma denudatum											1	1
	juvenile Gonostoma sp.									4
	Gonostoma bathyphilum "elongated bristlemouth"																		1
Eels	Derichthys serpentinus, "narrownecked oceanic eel"				1
	leptocephalus eel larva									1									2
Halfbeak	Hyporhampus meeki							3
Needlefish	Scomberesox cf saurus, "Atlantic saury"						1
deepsea smelt	Melanolagus cf. bericoides											1
Microstomatidae	Unidentified Microstomatid						few	1
Macrouridae	Unidentified Macrourid		1
basslet	Howella atlantica, "Atlantic pelagic basslet"		1	1
bigscale fish	Melamphaes cf. suborbitalis	1										1				3	2		1
Unidentified	Unidentified								1
misc juvenile fish							2
Euphausids		many	many			many	many		24		many				many			1	5	10
Copepods	Euchaeta sp.		many						1					several	many	several		7	1
Penaeid shrimp	penaeids								38										3	8
Caridean shrimp	Acanthephyra pelagica, 6cm															6			7	3
Amphipods	small amphipods								3							1
	hyperiids	many	many	many		many		2	2	2		1			many		1	1	2
	clear hyperiid								1
	Phronima sedentaria					4			2		3	2	2						1	1
	Vibilia sp.															many
	Primno sp.													many		many
	Scypholanceola sp.															1
Ostracods	halocyprids											10
	cladocopina																			1
other crustaceans	pelagic anomuran	1
	Portunid "swimming crab"	3								3
Cephalopods	Histioteuthis reversa, "jewel squid"						1		1
	Octopoteuthis cf. sicula, "Ruppell's octopus squid"						1
	Doryteuthis cf. pealeii, "longfin inshore squid"
	oegopsid squid																		1
	cranghiid squid
Pteropods	Clio pyramidata					many		8		1							2	4	2	6
	Limacina helicoides												4							1
	Cavolinia sp.									2
	Oxygyrus keraudreni									2										1
	diacria trispinosa atlantica
Heteropods	carinaria lamarckii																			1
	pterotrachea coronata "sea elephant"																		1
Gymnosome pteropods	Clione gracilis													7
	Notobranchaea hjorti															1
Chaetognaths			many			many												4	4	8
Ctenophores	Beroe cucumis																1
	pleurobranchia																		1
Scyphozoa	jellyfish					many											1		7	5
Siphonophores												3
Annelids	Tomopteris sp. pelagic polychaete											1
	other pelagic annelid															1
Radiolarians												15
Salps	Salpa fusiformis																1			5
	Soestia zonaria																	1
	Doliolid																	4
	pegea socia																		1
	unidentified damaged salps																		4

## Sheet: IKMWT sampling log
Cruise	Tow number	station	Day at Station	Date	Latitude	Longitude	Target depth (m)	Total tow time (hrs)	Actual depth (m)	Time at depth (hrs)	Tow speed at depth (knots)
NAAMES 2	1	1	1	2016-05-18	56N 20.008'	46W 2.839'	490	01:36:00	650	00:26:00	2.5
	2	2	1	2016-05-20	53N 29.20''	43W 06.66'	400	N/A	410	00:21:00	3
	3	3	1	2016-05-22	50N 00.59'	43W 54.49'	500	N/A	480	00:20:00	2.5
	4	4	1	2016-05-24	47N 37.47	39W 03.15'	493	00:55:00	581	00:27:00	2.5
	5	4	2	2016-05-25	47N 30.88	38W 47.87'	400	01:25:00	440	1900-01-20	2.2
	6	4	3	2016-05-26	47N 23.5	38W 42.41'	600	01:08:00	642	00:26:00	2
	7	4	4	2016-05-27	47N 19.98	38W 17.07'	1000	01:18:00	930	00:26:00	1.3
	8	5	1	2016-05-29	44N 13.10	43N 29.13'	400	00:48:00	388	00:18:00	2
NAAMES 3	1	1	1	2017-09-04	42N 22.89	42W 54.348'	500	N/A	500	40	1.5
	2	2	1	2017-09-06	44N 20'	43W 20'	345	N/A	325	40	1.5
	3	3	1	2017-09-08	47N 0.103'	40W 8.33'	400-900	2	400-900	01:36:00	1.5-3.5
	4	4	1	2017-09-10	48N 38.173'	39W 6.949'	500	1	500	40	2
	5	5	1	2017-09-12	51N 43.319'	39W 35.5'	300	~1	300	40	N/A
	6	6	2	2017-09-15	53N 22.816'	39W 32.063'	400	~1	400-250	40	1.6
	7	6	3	2017-09-16	53 N 22.483'	39W 34.947'	550	~2	458	50	3.5
NAAMES 4	1	2	1	2018-03-28	39N 16'	41W 12'	450	~2	400-440	01:00:00	2
	2	E4	1	2018-04-02	40N 18'	40W 18'	400	~1	370	00:45:00	1.1
	3	2RD	1	2018-04-03	39N 53'	38W 45'	1000	01:30:00	N/A	00:30:00	N/A
	4	2RF	1	2018-04-05	N/A	N/A	N/A	N/A	N/A	N/A	N/A
